# Supplementary material
Source: Springer Nature journal article supplement (https://www.springermedizin.de/resource/supplementary/12916_2013_868_MOESM2_ESM.pdf/9598518)
Supplement: MOESM2 [file 9598518]

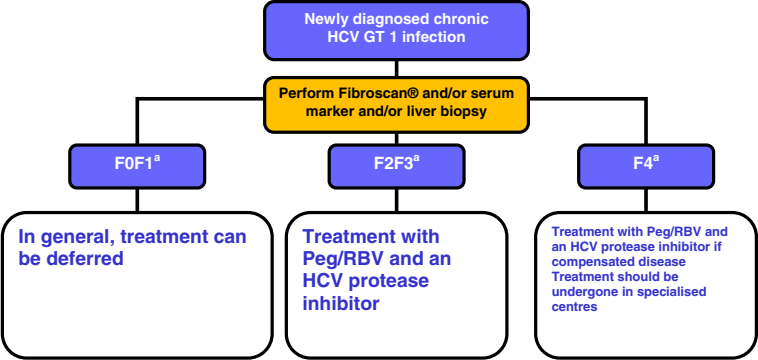

**a** Metavir fibrosis score: F0 = no fibrosis; F1 = portal fibrosis, no septae; F2 = portal fibrosis, few septae; F3 = bridging fibrosis; F4 = cirrhosis; Peg, pegylated interferon; RBV, ribavirin
